# Supplementary material
Source: MDPI journal article supplement (https://www.mdpi.com/2227-9717/12/2/400)
Supplement: s1 [file s1]

## Supplementary materials

**Table S.1** CEC2013 test suite.

| Type                       | No. | Functions                                      | Search Range | $F_{min}$ |
|----------------------------|-----|------------------------------------------------|--------------|-----------|
| Unimodal functions         | 1   | Sphere Function                                | [-100,100]   | -1400     |
|                            | 2   | Rotated High Conditioned Elliptic Function     | [-100,100]   | -1300     |
|                            | 3   | Rotated Bent Cigar Function                    | [-100,100]   | -1200     |
|                            | 4   | Rotated Discus Function                        | [-100,100]   | -1100     |
|                            | 5   | Different Powers Function                      | [-100,100]   | -1000     |
| Basic multimodal functions | 6   | Rotated Rosenbrock's Function                  | [-100,100]   | -900      |
|                            | 7   | Rotated Schaffers F7 Function                  | [-100,100]   | -800      |
|                            | 8   | Rotated Ackley's Function                      | [-100,100]   | -700      |
|                            | 9   | Rotated Weierstrass Function                   | [-100,100]   | -600      |
|                            | 10  | Rotated Griewank's Function                    | [-100,100]   | -500      |
|                            | 11  | Rastrigin's Function                           | [-100,100]   | -400      |
|                            | 12  | Rotated Rastrigin's Function                   | [-100,100]   | -300      |
|                            | 13  | Non-Continuous Rotated Rastrigin's Function    | [-100,100]   | -200      |
|                            | 14  | Schwefel's Function                            | [-100,100]   | -100      |
|                            | 15  | Rotated Schwefel's Function                    | [-100,100]   | 100       |
|                            | 16  | Rotated Katsuura Function                      | [-100,100]   | 200       |
|                            | 17  | Lunacek Bi Rastrigin Function                  | [-100,100]   | 300       |
|                            | 18  | Rotated Lunacek Bi rastrigin Function          | [-100,100]   | 400       |
|                            | 19  | Expanded Griewank's plus Rosenbrock's Function | [-100,100]   | 500       |
|                            | 20  | Expanded Scaffer's F6 Function                 | [-100,100]   | 600       |
| Composition functions      | 21  | Composition Function 1 ( $n = 5$ , Rotated)    | [-100,100]   | 700       |
|                            | 22  | Composition Function 2 ( $n = 3$ , Unrotated)  | [-100,100]   | 800       |
|                            | 23  | Composition Function 3 ( $n = 3$ , Rotated)    | [-100,100]   | 900       |
|                            | 24  | Composition Function 4 ( $n = 3$ , Rotated)    | [-100,100]   | 1000      |
|                            | 25  | Composition Function 5 ( $n = 3$ , Rotated)    | [-100,100]   | 1100      |
|                            | 26  | Composition Function 6 ( $n = 5$ , Rotated)    | [-100,100]   | 1200      |
|                            | 27  | Composition Function 7 ( $n = 5$ , Rotated)    | [-100,100]   | 1300      |
|                            | 28  | Composition Function 8 ( $n = 5$ , Rotated)    | [-100,100]   | 1400      |

**Table S.2** CEC2017 test suite.

|                       | No. | Functions                                               | Search Range | $F_{min}$ |
|-----------------------|-----|---------------------------------------------------------|--------------|-----------|
| Unimodal functions    | 1   | Shifted and Rotated Bent Cigar Function                 | [-100,100]   | 100       |
|                       | 3   | Shifted and Rotated Zakharov Function                   | [-100,100]   | 300       |
|                       | 4   | Shifted and Rotated Rosenbrock's Function               | [-100,100]   | 400       |
| Multimodal functions  | 5   | Shifted and Rotated Rastrigin's Function                | [-100,100]   | 500       |
|                       | 6   | Shifted and Rotated Expanded Scaffer's F6 Function      | [-100,100]   | 600       |
|                       | 7   | Shifted and Rotated Lunacek Bi-Rastrigin Function       | [-100,100]   | 700       |
|                       | 8   | Shifted and Rotated Non-Continuous Rastrigin's Function | [-100,100]   | 800       |
|                       | 9   | Shifted and Rotated Levy Function                       | [-100,100]   | 900       |
|                       | 10  | Shifted and Rotated Schwefel's Function                 | [-100,100]   | 1000      |
|                       | 11  | Hybrid Function 1 ( $N=3$ )                             | [-100,100]   | 1100      |
|                       | 12  | Hybrid Function 2 ( $N=3$ )                             | [-100,100]   | 1200      |
| Hybrid functions      | 13  | Hybrid Function 3 ( $N=3$ )                             | [-100,100]   | 1300      |
|                       | 14  | Hybrid Function 4 ( $N=4$ )                             | [-100,100]   | 1400      |
|                       | 15  | Hybrid Function 5 ( $N=4$ )                             | [-100,100]   | 1500      |
|                       | 16  | Hybrid Function 6 ( $N=4$ )                             | [-100,100]   | 1600      |
|                       | 17  | Hybrid Function 6 ( $N=5$ )                             | [-100,100]   | 1700      |
|                       | 18  | Hybrid Function 6 ( $N=5$ )                             | [-100,100]   | 1800      |
|                       | 19  | Hybrid Function 6 ( $N=5$ )                             | [-100,100]   | 1900      |
|                       | 20  | Hybrid Function 6 ( $N=6$ )                             | [-100,100]   | 2000      |
| Composition functions | 21  | Composition Function 1 ( $N=3$ )                        | [-100,100]   | 2100      |
|                       | 22  | Composition Function 2 ( $N=3$ )                        | [-100,100]   | 2200      |
|                       | 23  | Composition Function 3 ( $N=4$ )                        | [-100,100]   | 2300      |
|                       | 24  | Composition Function 4 ( $N=4$ )                        | [-100,100]   | 2400      |
|                       | 25  | Composition Function 5 ( $N=5$ )                        | [-100,100]   | 2500      |
|                       | 26  | Composition Function 6 ( $N=5$ )                        | [-100,100]   | 2600      |
|                       | 27  | Composition Function 7 ( $N=6$ )                        | [-100,100]   | 2700      |
|                       | 28  | Composition Function 8 ( $N=6$ )                        | [-100,100]   | 2800      |
|                       | 29  | Composition Function 9 ( $N=3$ )                        | [-100,100]   | 2900      |
|                       | 30  | Composition Function 10 ( $N=3$ )                       | [-100,100]   | 3000      |

**Table S.3.** Comparison of time usage (s)

|      | PSO   | CLPSO | DMS-PSO | HCLPSO | EPSO  | TAPSO | APSO-SL |
|------|-------|-------|---------|--------|-------|-------|---------|
| F1   | 3.88  | 11.77 | 8.26    | 4.42   | 10.98 | 15.46 | 12.11   |
| F2   | 4.19  | 10.68 | 9.15    | 4.26   | 13.54 | 14.65 | 12.87   |
| F3   | 5.01  | 12.55 | 8.31    | 5.65   | 15.21 | 14.52 | 14.32   |
| F4   | 3.77  | 10.94 | 7.55    | 4.68   | 13.02 | 14.75 | 13.76   |
| F5   | 3.89  | 10.72 | 5.88    | 4.54   | 16.11 | 13.35 | 15.40   |
| F6   | 4.23  | 9.66  | 7.66    | 4.73   | 11.34 | 13.26 | 12.11   |
| F7   | 6.88  | 14.21 | 9.58    | 7.82   | 19.00 | 17.98 | 17.75   |
| F8   | 6.65  | 13.95 | 12.55   | 6.88   | 16.01 | 16.54 | 15.90   |
| F9   | 24.51 | 38.16 | 28.78   | 26.15  | 47.15 | 44.62 | 42.87   |
| F10  | 4.77  | 12.20 | 9.12    | 5.46   | 14.13 | 14.65 | 12.98   |
| F11  | 5.53  | 13.11 | 10.23   | 6.34   | 16.31 | 15.32 | 14.22   |
| F12  | 6.19  | 13.88 | 12.35   | 7.66   | 14.62 | 15.64 | 16.84   |
| F13  | 6.20  | 12.95 | 11.25   | 7.98   | 17.62 | 16.65 | 14.87   |
| F14  | 5.60  | 12.61 | 11.87   | 6.78   | 15.32 | 15.32 | 13.86   |
| F15  | 5.75  | 12.12 | 12.35   | 6.58   | 15.64 | 16.96 | 14.33   |
| F16  | 9.11  | 16.21 | 17.65   | 10.99  | 18.88 | 23.64 | 21.87   |
| F17  | 4.69  | 12.10 | 8.45    | 5.69   | 14.33 | 14.34 | 12.67   |
| F18  | 5.55  | 11.67 | 8.98    | 6.76   | 13.52 | 15.67 | 13.09   |
| F19  | 4.31  | 9.30  | 7.75    | 4.88   | 11.77 | 16.32 | 12.76   |
| F20  | 5.19  | 10.11 | 10.23   | 6.59   | 14.33 | 15.97 | 14.98   |
| F21  | 9.70  | 17.65 | 14.65   | 9.69   | 27.22 | 21.56 | 15.11   |
| F22  | 10.41 | 16.23 | 18.95   | 10.44  | 25.11 | 23.31 | 15.67   |
| F23  | 11.55 | 17.65 | 22.65   | 11.55  | 40.26 | 26.89 | 14.87   |
| F24  | 31.91 | 43.55 | 34.61   | 28.61  | 61.84 | 51.64 | 36.78   |
| F25  | 30.90 | 45.62 | 37.65   | 29.89  | 75.55 | 54.68 | 34.87   |
| F26  | 30.22 | 48.65 | 40.21   | 31.23  | 33.44 | 58.67 | 35.87   |
| F27  | 31.40 | 48.61 | 41.26   | 30.56  | 51.24 | 51.32 | 35.89   |
| F28  | 14.37 | 26.15 | 21.98   | 14.81  | 25.56 | 28.64 | 18.45   |
| Avg. | 10.32 | 19.04 | 16.06   | 11.13  | 23.89 | 23.95 | 17.46   |
